# Supplementary material for: Proteomics reveals dynamic metabolic changes in human hematopoietic stem progenitor cells from fetal to adulthood
Source: PubMed Central journal article supplement (PMC11403967; doi:10.1186/s13287-024-03930-x), 2024-09-15

**Supplemental Figure 1**

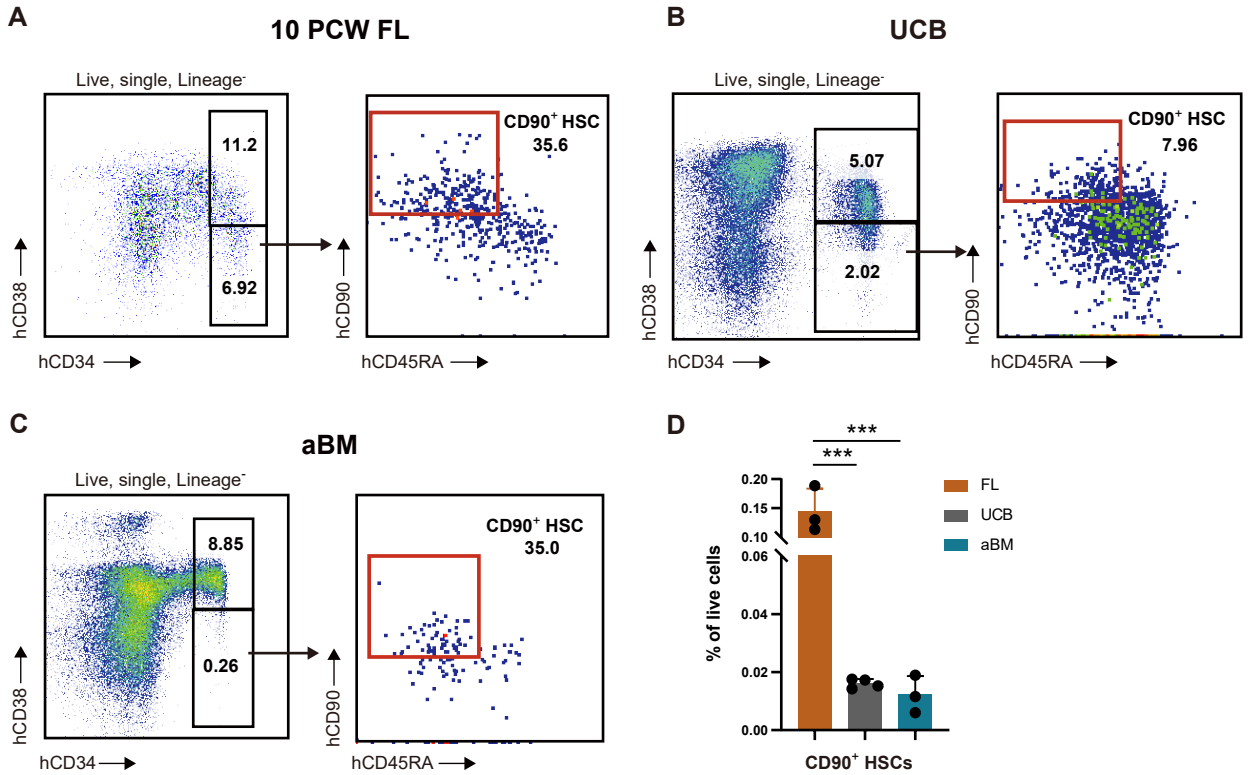

# Supplemental Figure 2

**A**

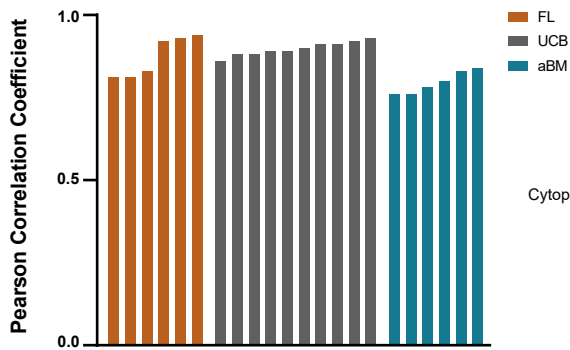

**C**

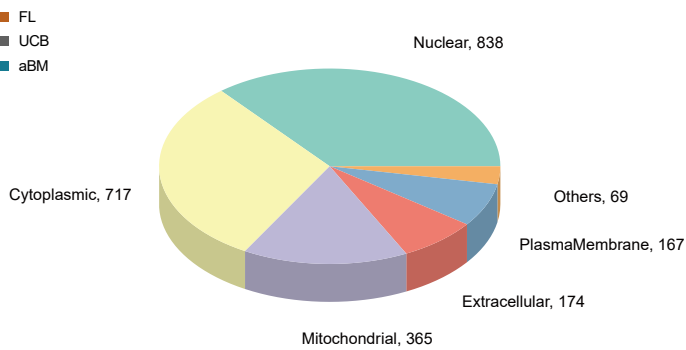

**B**

Regulated Type ● up ● down ● unchange

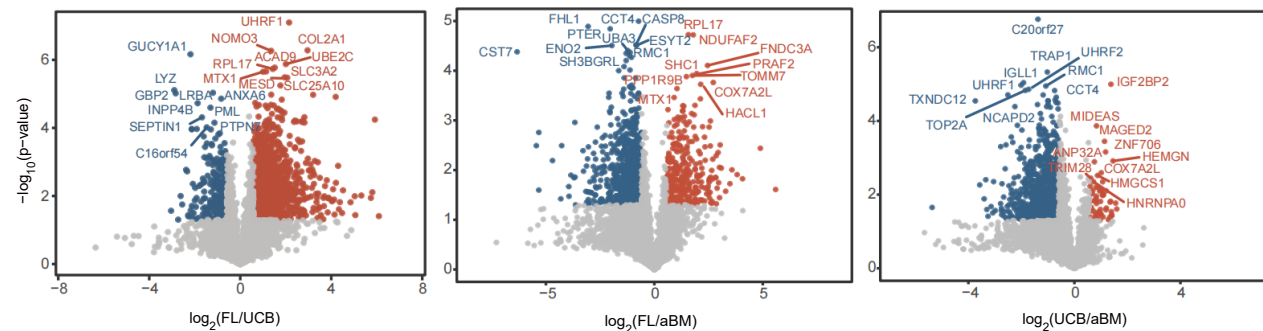

Supplemental Figure 3

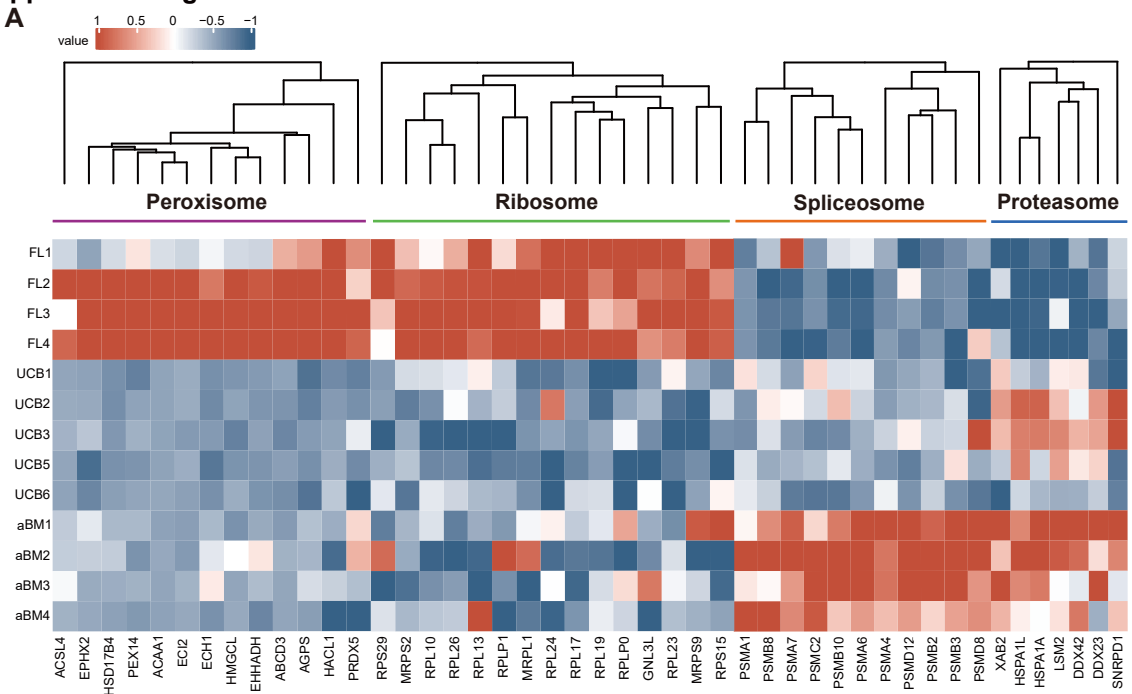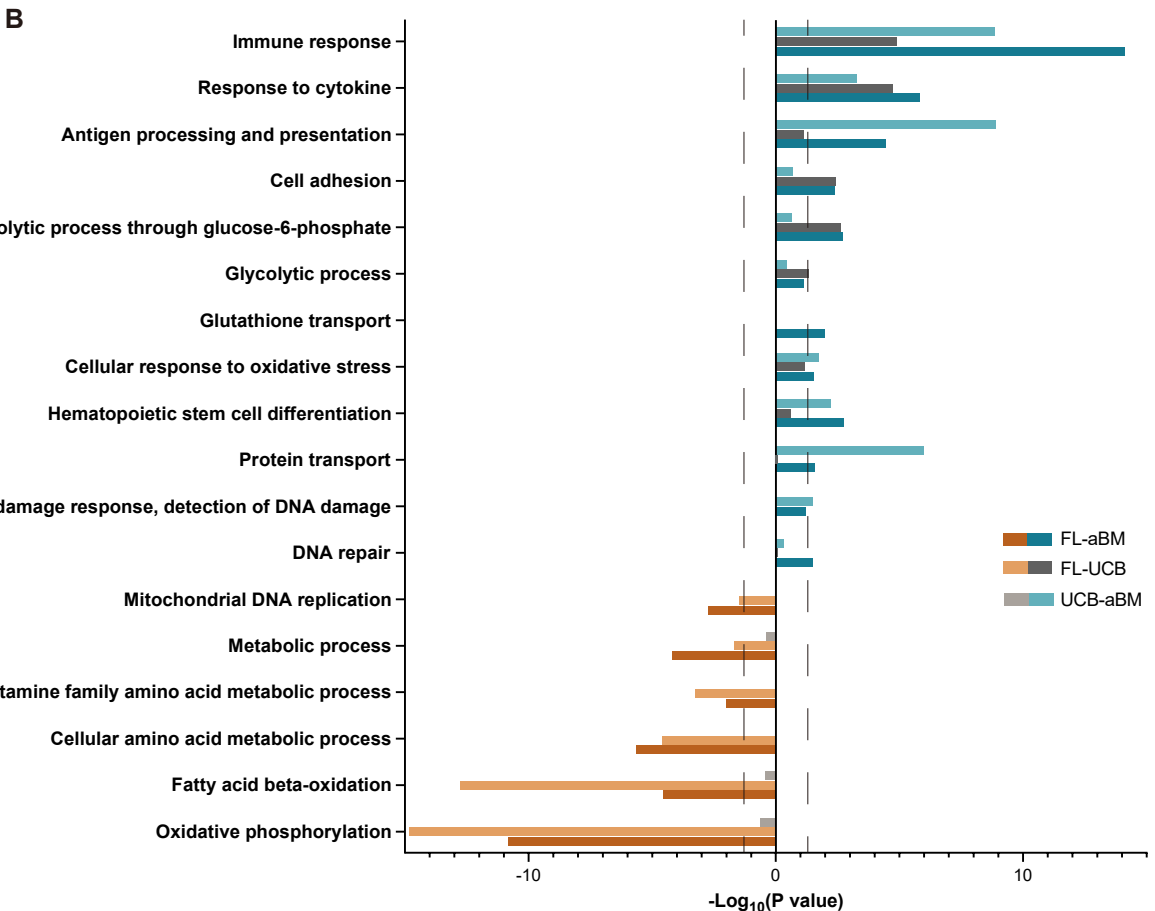

Supplemental Figure 4

A

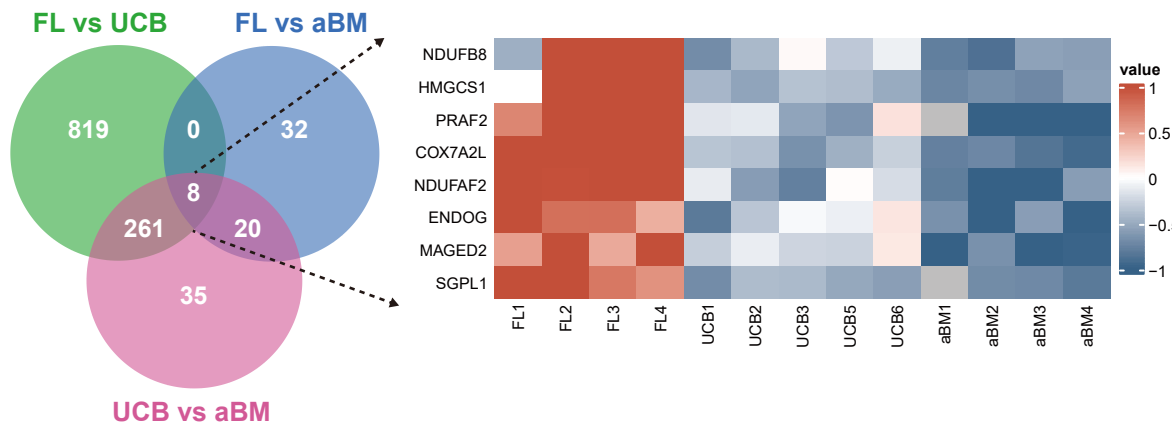

B

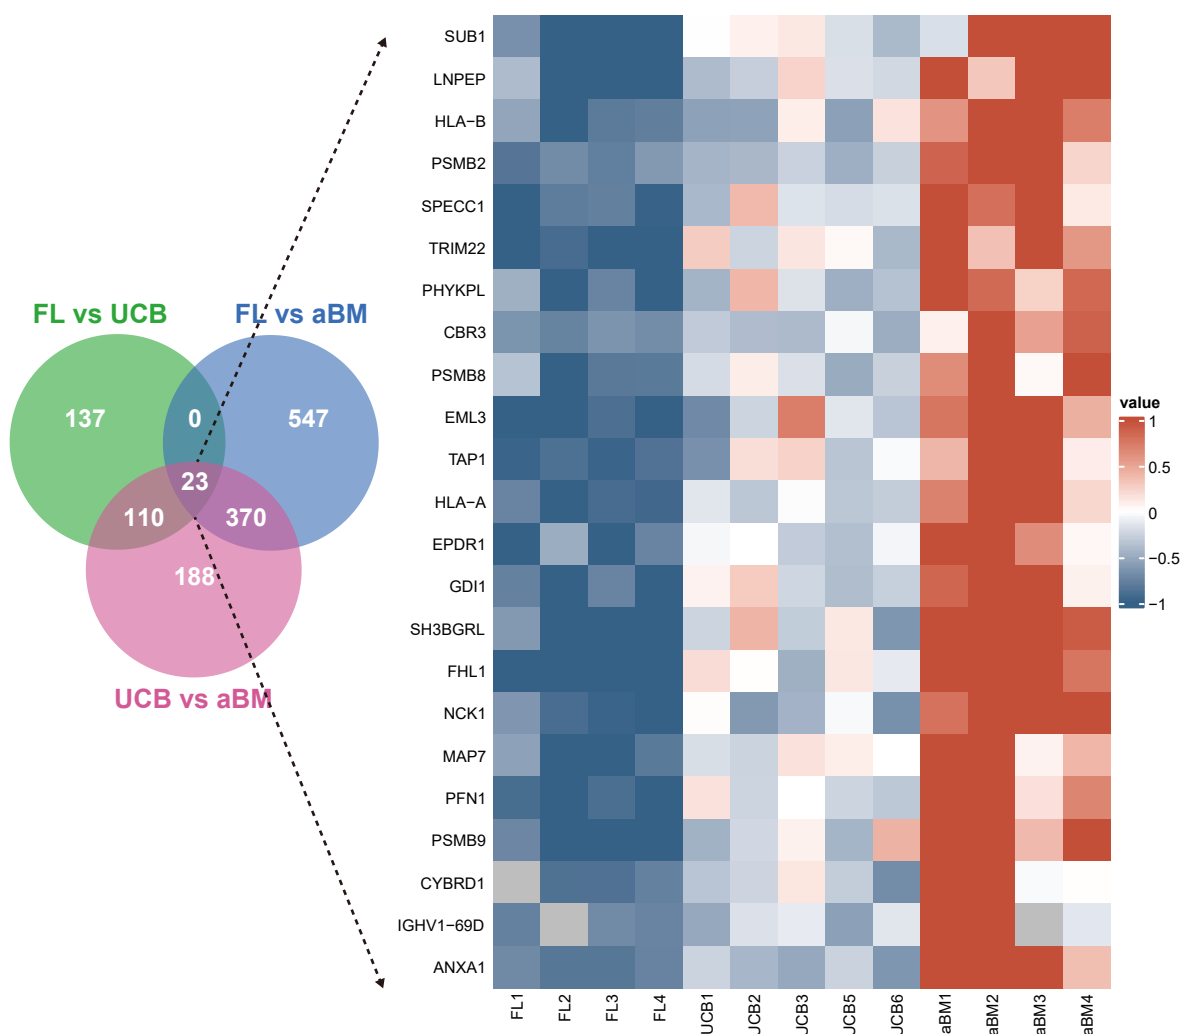

Supplemental Figure 5

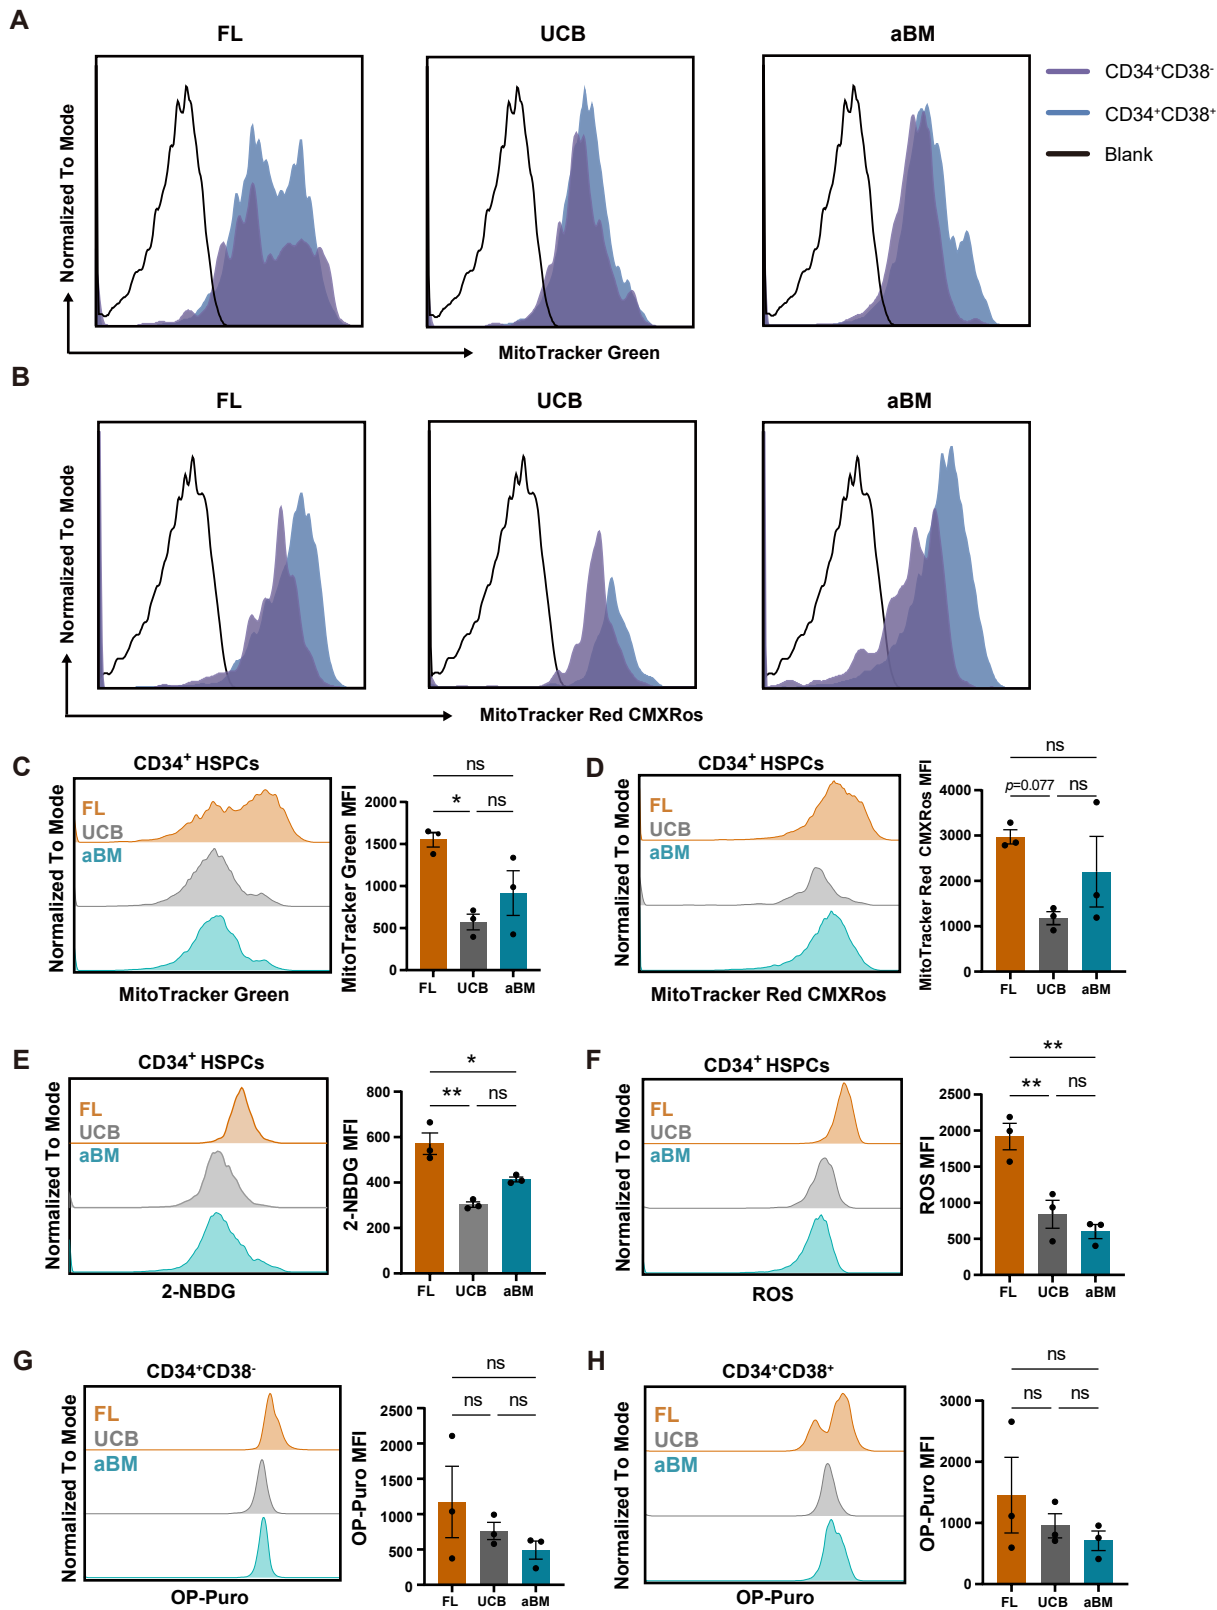

# Supplemental Figure 6

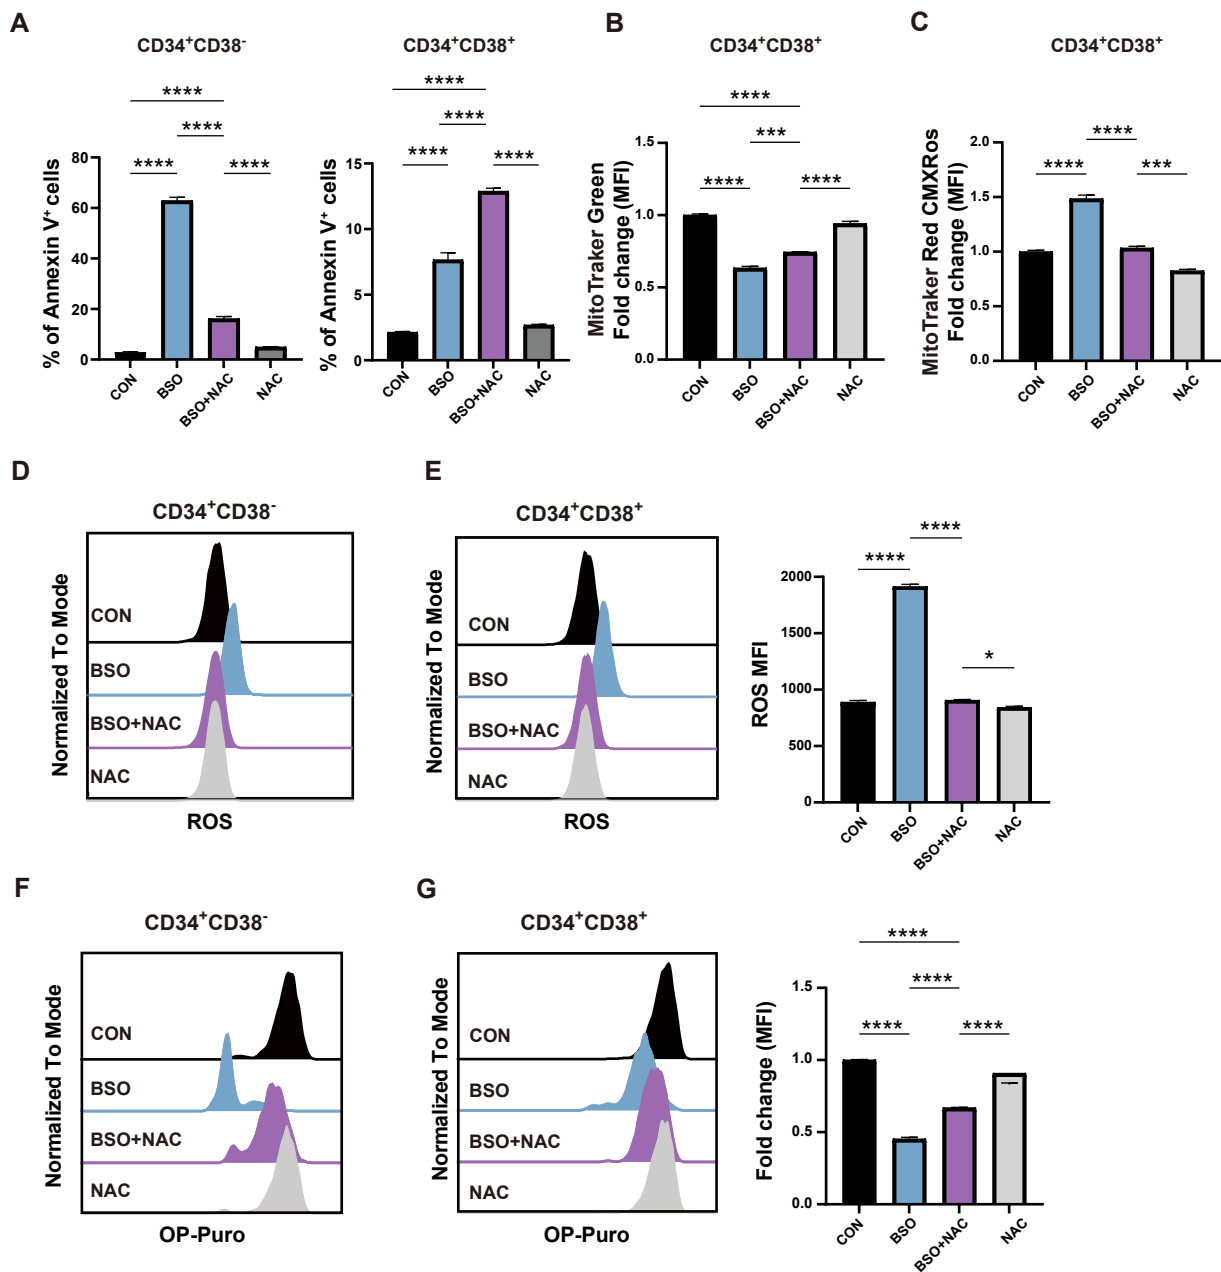

Supplemental Figure 7

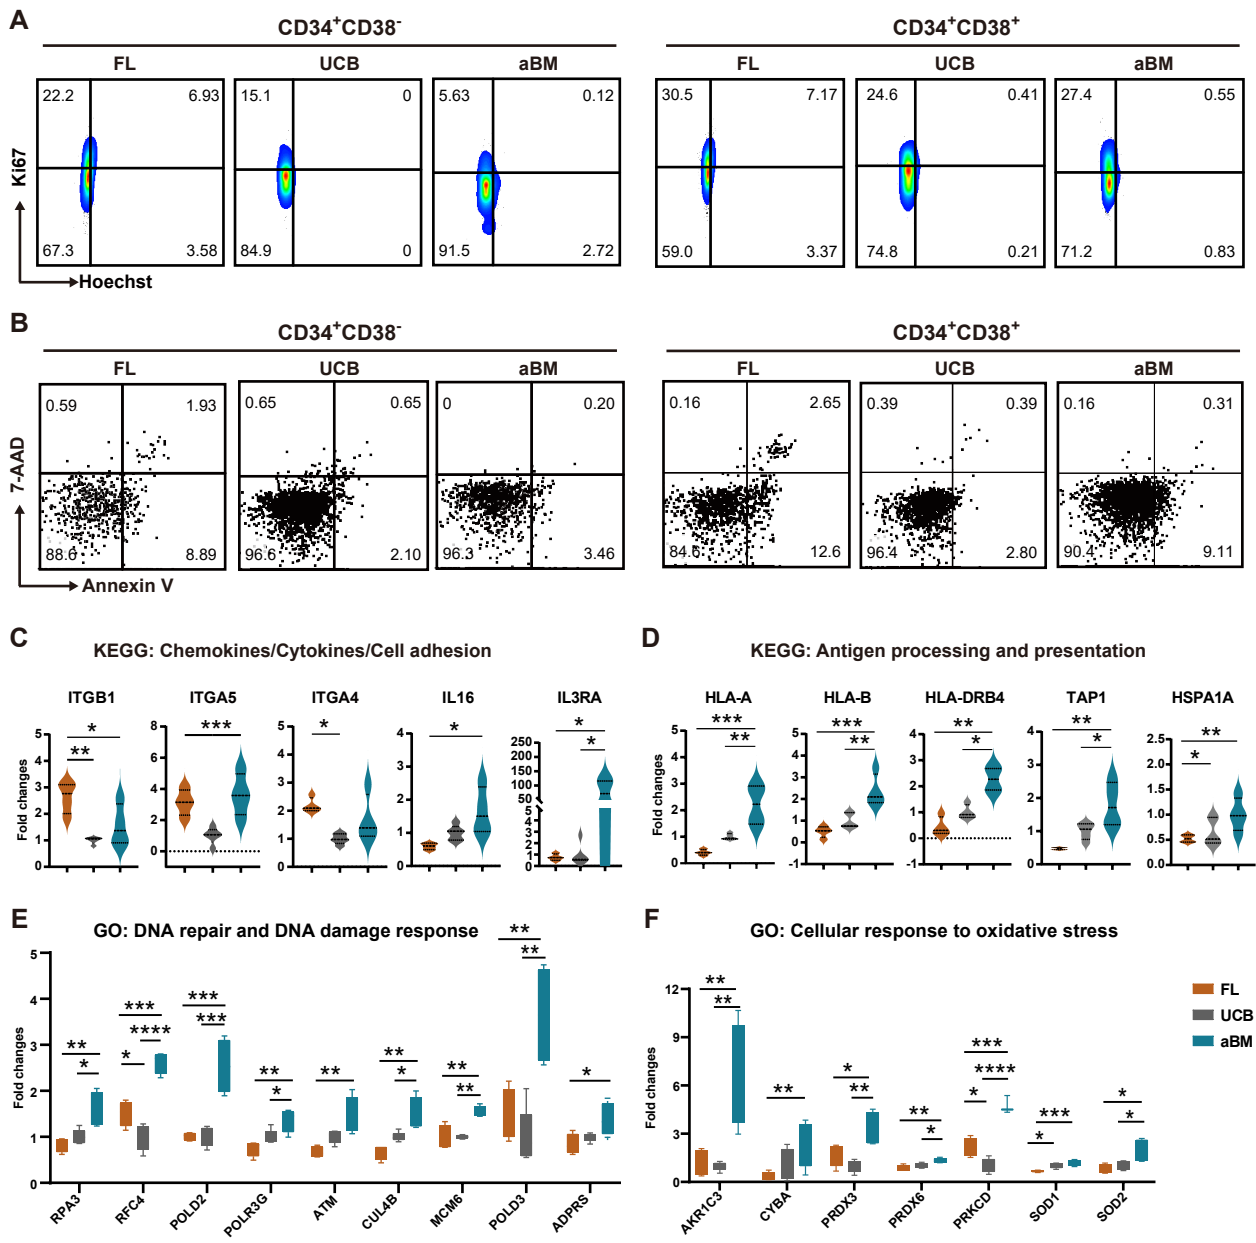

Supplement: 13287_2024_3930_MOESM1_ESM.pdf [file 13287_2024_3930_MOESM1_ESM.pdf]
